# Supplementary material for: Nickel-foam-supported β-Ni(OH)2 as a green anodic catalyst for energy efficient electrooxidative degradation of azo-dye wastewater
Source: Royal Society of Chemistry journal article supplement (doi:10.1039/c8ra03039a), 2018-01-01
Supplement: c8ra03039a1.pdf [file c8ra03039a1.pdf]

## Supplementary Information

### Nickel Foam Supported $\beta$ -Ni(OH)<sub>2</sub> as a Green Anodic Catalyst for Energy Efficient Electrooxidative Degradation of Azo-Dye Wastewaters

Shan Sun<sup>a</sup>, Peng Diao<sup>a,\*</sup>, Cuiyun Feng<sup>a</sup>, Eleonora-Mihaela Ungureanu<sup>b</sup>, Yi Tang<sup>c</sup>, Bin Hu<sup>c</sup>, Qing Hu<sup>c,\*</sup>

<sup>a</sup> School of Materials Science and Engineering, Beihang University, Beijing 100191, P. R. China

<sup>b</sup> Department of Physical Chemistry and Electrochemistry, Faculty of Applied Chemistry and Materials Science, University Politehnica of Bucharest, 060042, Romanian

<sup>c</sup> Southern University of Science and <sup>b</sup> Technology, Shenzhen, Guangdong, 518055, P. R. China.

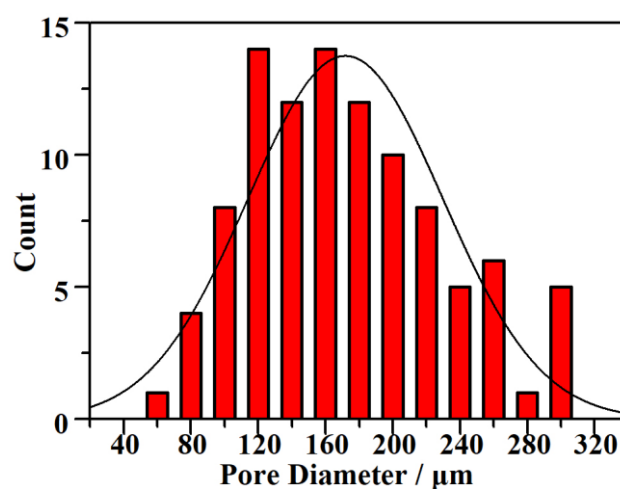

**Figure S1.** Pore diameter distribution of the nickel foam.

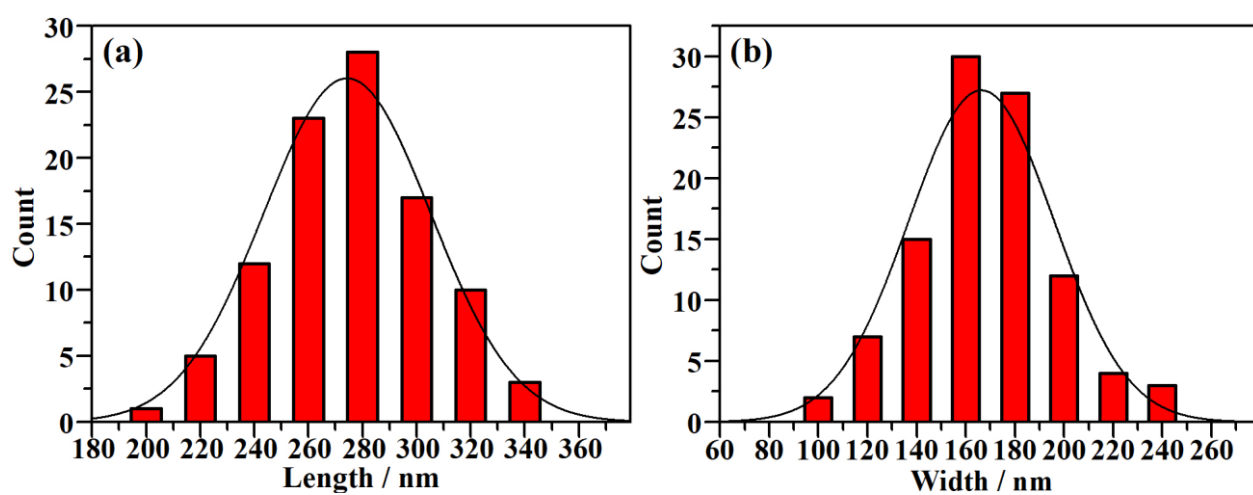

**Figure S2.** Statistical analysis of the length (a) and width (b) of the spindlelike  $\beta$ -Ni(OH)<sub>2</sub> nanorods prepared by hydrothermal growth in H<sub>2</sub>O<sub>2</sub> solution.

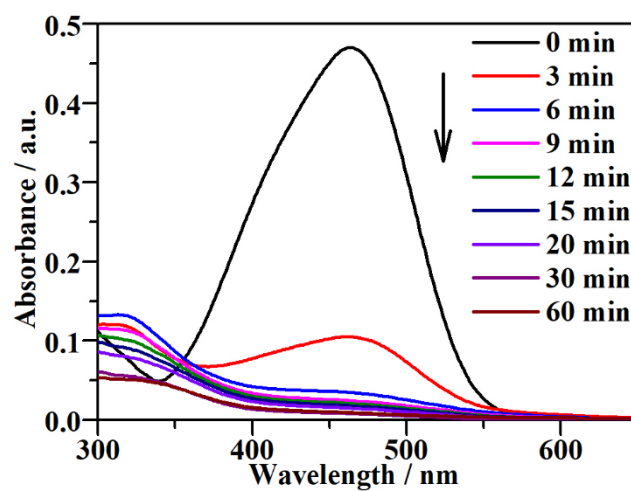

**Figure S3.** The variation of UV-Vis spectra of the MO solution as a function of time during galvanostatic degradation at current density of  $0.50 \text{ mA} \cdot \text{cm}^{-2}$ .
